# Supplementary material for: HostNet: improved sequence representation in deep neural networks for virus-host prediction
Source: Springer Nature journal article supplement (doi:10.1186/s12859-023-05582-9), 2023-12-01
Supplement: 12859_2023_5582_MOESM1_ESM.pdf [file 12859_2023_5582_MOESM1_ESM.pdf]

**Table S1 Vir-61 pre-training dataset data distribution.**

| Virus type          | Counts of genome sequences | Longest genome sequence bps | Shortest genome sequence bps | Counts of virus subtype |
|---------------------|----------------------------|-----------------------------|------------------------------|-------------------------|
| Rhabdoviridae       | 1773                       | 15867                       | 80                           | 218                     |
| Mesoniviridae       | 110                        | 20795                       | 86                           | 16                      |
| Togaviridae         | 10212                      | 22874                       | 72                           | 36                      |
| Parvoviridae        | 71                         | 6334                        | 289                          | 22                      |
| Reoviridae          | 9774                       | 4535                        | 97                           | 70                      |
| Phenuiviridae       | 6217                       | 9549                        | 60                           | 176                     |
| Peribunyaviridae    | 5018                       | 12268                       | 77                           | 270                     |
| Nairoviridae        | 4773                       | 14854                       | 165                          | 76                      |
| Nodaviridae         | 15                         | 3204                        | 1305                         | 5                       |
| Asfarviridae        | 6794                       | 193886                      | 84                           | 2                       |
| Poxviridae          | 45                         | 307691                      | 230                          | 11                      |
| Flaviviridae        | 56548                      | 11520                       | 35                           | 112                     |
| Nyamiviridae        | 17                         | 11840                       | 4708                         | 13                      |
| Picornaviridae      | 2                          | 7537                        | 7537                         | 2                       |
| Orthomyxoviridae    | 246                        | 2421                        | 273                          | 14                      |
| Papillomaviridae    | 2                          | 7428                        | 7428                         | 1                       |
| Baculoviridae       | 340                        | 178733                      | 20                           | 78                      |
| Carmotetraviridae   | 4                          | 6158                        | 6155                         | 1                       |
| Mononiviridae       | 2                          | 41178                       | 41178                        | 1                       |
| Nudiviridae         | 27                         | 231621                      | 96944                        | 11                      |
| Permutotetraviridae | 4                          | 5698                        | 2482                         | 2                       |
| Xinmoviridae        | 7                          | 13559                       | 6275                         | 7                       |
| Dicistroviridae     | 156                        | 10436                       | 8026                         | 15                      |
| Lispiviridae        | 6                          | 14440                       | 9903                         | 6                       |
| Ascoviridae         | 13                         | 199721                      | 741                          | 4                       |
| Alphatetraviridae   | 12                         | 6625                        | 2448                         | 5                       |
| Bidnaviridae        | 9                          | 6543                        | 6022                         | 1                       |
| Medioniviridae      | 3                          | 25068                       | 20278                        | 2                       |
| Chuviridae          | 52                         | 12004                       | 2291                         | 26                      |
| Polydnaviridae      | 478                        | 140906                      | 263                          | 15                      |
| Natareviridae       | 1                          | 12860                       | 12860                        | 1                       |
| Euroniviridae       | 3                          | 29385                       | 24648                        | 3                       |
| Polycipiviridae     | 16                         | 12155                       | 10315                        | 9                       |
| Iridoviridae        | 16                         | 220222                      | 163023                       | 7                       |
| Circoviridae        | 41                         | 2224                        | 1711                         | 13                      |
| Tymoviridae         | 2                          | 6532                        | 6532                         | 1                       |
| Alphasatellitidae   | 11                         | 1532                        | 1479                         | 2                       |
| Birnaviridae        | 13                         | 6065                        | 2778                         | 4                       |
| Metaviridae         | 1                          | 7510                        | 7510                         | 1                       |
| Phasmaviridae       | 70                         | 7243                        | 1527                         | 13                      |
| Genomoviridae       | 55                         | 2373                        | 2093                         | 34                      |
| Hytrosaviridae      | 5                          | 190291                      | 124279                       | 2                       |
| Artoviridae         | 8                          | 12395                       | 6367                         | 7                       |
| Mypoviridae         | 3                          | 9874                        | 2579                         | 1                       |
| Iflaviridae         | 114                        | 10967                       | 8680                         | 15                      |
| Soliniviridae       | 5                          | 10913                       | 10411                        | 2                       |
| Bacilladnaviridae   | 6                          | 4742                        | 4576                         | 3                       |
| Cruliviridae        | 6                          | 6691                        | 799                          | 2                       |
| Sarthroviridae      | 8                          | 872                         | 502                          | 1                       |
| Myriaviridae        | 1                          | 13517                       | 13517                        | 1                       |
| Roniviridae         | 9                          | 26769                       | 26253                        | 2                       |
| Aliusviridae        | 2                          | 13741                       | 13732                        | 2                       |
| Smacoviridae        | 2                          | 2546                        | 2546                         | 1                       |
| Tobaniviridae       | 1                          | 25960                       | 25960                        | 1                       |
| Sinhaliviridae      | 3                          | 5911                        | 5898                         | 2                       |
| Anelloviridae       | 1                          | 2782                        | 2782                         | 1                       |
| Nimaviridae         | 57                         | 309286                      | 19                           | 1                       |
| Wupedeviridae       | 4                          | 11563                       | 1942                         | 1                       |
| Qiniviridae         | 16                         | 6585                        | 1601                         | 8                       |
| Yueviridae          | 4                          | 6858                        | 1212                         | 2                       |
| NAV                 | 252                        | 12184                       | 209                          | 16                      |

**Table S2 Rabies lyssavirus dataset data distribution.**

| Host type                       | Counts of genome sequences | Longest genome sequence bps | Shortest genome sequence bps |
|---------------------------------|----------------------------|-----------------------------|------------------------------|
| <i>Canis lupus</i>              | 5121                       | 11927                       | 158                          |
| <i>Equus caballus</i>           | 118                        | 11924                       | 163                          |
| <i>Bos taurus</i>               | 2280                       | 11939                       | 117                          |
| <i>Tadarida brasiliensis</i>    | 245                        | 11923                       | 264                          |
| <i>Desmodus rotundus</i>        | 164                        | 11923                       | 164                          |
| <i>Artibeus lituratus</i>       | 90                         | 11922                       | 320                          |
| <i>Eptesicus fuscus</i>         | 460                        | 11924                       | 264                          |
| <i>Procyon lotor</i>            | 558                        | 11939                       | 291                          |
| <i>Mephitis mephitis</i>        | 672                        | 11929                       | 220                          |
| <i>Vulpes lagopus</i>           | 178                        | 11926                       | 211                          |
| <i>Lasiurus borealis</i>        | 96                         | 11924                       | 264                          |
| <i>Capra hircus</i>             | 100                        | 11923                       | 117                          |
| <i>Cerdocyon thous</i>          | 82                         | 11881                       | ã                            |
| <i>Nyctereutes procyonoides</i> | 101                        | 11928                       | 211                          |
| <i>Felis catus</i>              | 259                        | 11939                       | 157                          |
| <i>Vulpes vulpes</i>            | 683                        | 11939                       | 198                          |
| <i>Homo sapiens</i>             | 478                        | 11928                       | 165                          |

**Table S3 Flavivirus dataset data distribution.**

| Host type     | Counts of genome sequences | Longest genome sequence bps | Shortest genome sequence bps |
|---------------|----------------------------|-----------------------------|------------------------------|
| <i>Culex</i>  | 2424                       | 10380                       | 8025                         |
| <i>Ixodes</i> | 373                        | 10269                       | 10149                        |
| <i>Aedes</i>  | 6829                       | 10986                       | 9939                         |
